# Supplementary material for: Influence of the Accelerated Aging Process on the Fragment-Resistant Properties of Para-Aramid Body Armor
Source: MDPI journal article supplement (doi:10.3390/ma15186492), 2022-09-19

## Supplementary materials

### Influence of accelerated aging process on the fragment-resistant properties of para-aramid body armor

**Table S1.** 5% and 50% temperature-induced mass loss of the raw para-aramid material.

| No. | Tested sample | Parameter | Before ageing | Accelerated ageing 194 days |
|-----|---------------|-----------|---------------|-----------------------------|
| 1   | Raw           | T5 [°C]   | 544           | 542                         |
| 2   |               | T50 [°C]  | 587           | 588                         |

**Figure S1.** Thermogravimetric curves of the raw para-aramid material.

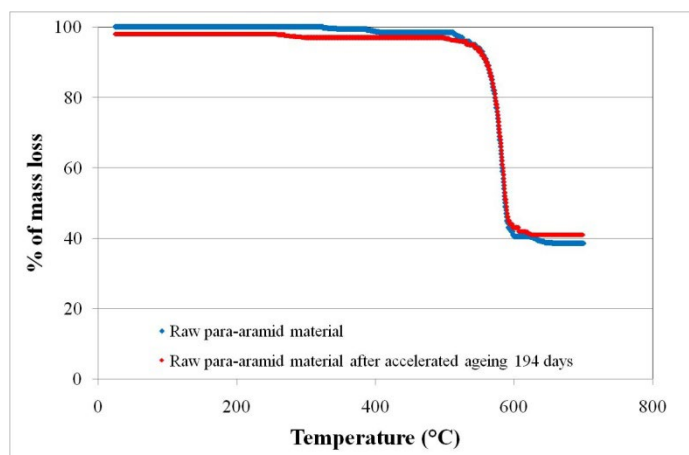

**Table S2.** 5% and 50% temperature-induced mass loss of sample A and B (TG analysis performed in air atmosphere).

| No. | Tested sample | Parameter | Before ageing | Accelerated ageing 194 days |
|-----|---------------|-----------|---------------|-----------------------------|
| 3   | Sample A      | T5 [°C]   | 310           | 406                         |
| 4   |               | T50 [°C]  | 547           | 548                         |
| 5   | Sample B      | T5 [°C]   | 304           | 452                         |
| 6   |               | T50 [°C]  | 548           | 551                         |

**Figure S2.** Thermogravimetric curves of sample A and B obtained in air atmosphere.

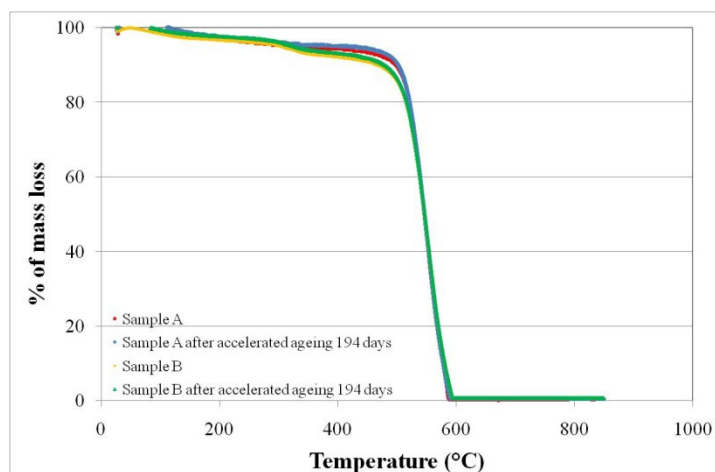

Supplement: s1 [file s1]
